# Supplementary material
Source: ML conference proceedings conference paper supplement (https://proceedings.mlr.press/v80/weiss18a.html)
Supplement: Supplementary file [file weiss18a-supp.pdf]

---

# Supplementary Material - Extracting Automata from Recurrent Neural Networks Using Queries and Counterexamples

---

Gail Weiss<sup>1</sup> Yoav Goldberg<sup>2</sup> Eran Yahav<sup>1</sup>

This supplementary material contains a description of the L\* algorithm (Section 1), and additional experimental results and details (Section 2).

## 1. Angluin’s L\* Algorithm

---

**Algorithm 1** L\* Algorithm with explicit membership and equivalence queries.

---

```
 $S \leftarrow \{\epsilon\}, E \leftarrow \{\epsilon\}$ 
for ( $s \in S$ ), ( $a \in \Sigma$ ), and ( $e \in E$ ) do
   $T[s, e] \leftarrow \mathbf{Member}(s \cdot e)$ 
   $T[s \cdot a, e] \leftarrow \mathbf{Member}(s \cdot a \cdot e)$ 
end for
while True do
  while ( $s_{new} \leftarrow \mathit{Closed}(S, E, T) \neq \perp$ ) do
     $\mathit{Add}(S, s_{new})$ 
    for ( $a \in \Sigma, e \in E$ ) do
       $T[s_{new} \cdot a, e] \leftarrow \mathbf{Member}(s_{new} \cdot a \cdot e)$ 
    end for
  end while
   $\mathcal{A} \leftarrow \mathit{MakeHypothesis}(S, E, T)$ 
   $cex \leftarrow \mathbf{Equivalence}(\mathcal{A})$ 
  if  $cex = \perp$  then
    return  $\mathcal{A}$ 
  else
     $e_{new} \leftarrow \mathit{FindSuffix}(cex)$ 
     $\mathit{Add}(E, e_{new})$ 
    for ( $s \in S, a \in \Sigma$ ) do
       $T[s, e_{new}] \leftarrow \mathbf{Member}(s \cdot e_{new})$ 
       $T[s \cdot a, e_{new}] \leftarrow \mathbf{Member}(s \cdot a \cdot e_{new})$ 
    end for
  end if
end while
```

---

Angluin’s L\* algorithm (1987) is an exact learning algorithm

<sup>1</sup>Technion, Haifa, Israel <sup>2</sup>Bar Ilan University, Ramat Gan, Israel.  
Correspondence to: Gail Weiss <sgailw@cs.technion.ac.il>.

for regular languages. The algorithm learns an unknown regular language  $U$  over an alphabet  $\Sigma$ , generating a DFA that accepts  $U$  as output. We only provide a brief and informal description of the algorithm; for further details see (Angluin, 1987; Berg et al., 2005).

Algorithm 1 shows the L\* algorithm. This version is adapted from Alur et al. (2005), where the membership and equivalence queries have been made more explicit than they appear in Angluin (1987).

The algorithm maintains an *observation table*  $(S, E, T)$  that records whether strings belong to  $U$ . In Algorithm 1, this table is represented by the two-dimensional array  $T$ , with dimensions  $|S| \times |E|$ , where, informally, we can view  $S$  as a set of words that lead from the initial state to states of the hypothesized automaton, and  $E$  as a set of words serving as experiments to separate states. The table  $T$  itself maps a word  $w \in (S \cup S \cdot \Sigma) \cdot E$  to **True** if  $w \in U$  and **False** otherwise.

The table is updated by invoking membership queries to the teacher. When the algorithm reaches a consistent and closed observation table (meaning that all states have outgoing transitions for all letters, without contradictions), the algorithm constructs a hypothesized automaton  $\mathcal{A}$ , and invokes an *equivalence query* to check whether  $\mathcal{A}$  is equivalent to the automaton known to the teacher. If the hypothesized automaton accepts exactly  $U$ , then the algorithm terminates. If it is not equivalent, then the teacher produces a counterexample showing a difference between  $U$  and the language accepted by  $\mathcal{A}$ .

A simplified run through of the algorithm is as follows: the learner starts with an automaton with one state—the initial state—which is accepting or rejecting according to the classification of the empty word. Then, for every state in the automaton, for every letter in the alphabet, the learner verifies by way of membership queries that for every shortest sequence reaching that state, the continuation from that prefix with that letter is correctly classified. As long as an inconsistency exists, the automaton is refined. Every time the automaton reaches a consistent state (a complete transition function, with no inconsistencies by single-letter

extensions), that automaton is presented to the teacher as an equivalence query. If it is accepted, the algorithm completes; otherwise, it uses the teacher-provided counterexample to further refine the automaton.

## 2. Additional Results

### 2.1. Random Regular Languages

We show results for extraction from GRU and LSTM networks with varying hidden sizes, trained on small regular languages of varying alphabet size and DFA size. Each extraction was limited to 30 seconds, and had initial refinement depth 10. For each of the combinations of state size and target language complexity, 3 networks of each type were trained, each on a different (randomly generated) language. The full results of these experiments are shown in Table 1. Note that each row in each of the tables represents 3 experiments, i.e. in total  $9 \times 2 \times 3 = 54$  random DFAs were generated, trained on, and re-extracted.

We note with satisfaction that in 36 of the 54 experiments, the extraction process reached equivalence on a regular language identical to the target language the network had been trained on. We also note that on one occasion in the LSTM experiments the extraction reached equivalence too easily, accepting an automaton of size 2 that ultimately was not a great match for the network. Such a problem could be countered by increasing the initial split depth, for instance when sampling shows that a too-simple automaton has been extracted.

We also ran extraction with Omlin and Giles’ a-priori quantization on each of these networks, with quantization level 2 and a time limit of 50 seconds. The extractions did not complete in this time. For completeness, we present the size, coverage, and accuracies of these partially extracted DFAs in Table 2. The smaller size of the extracted DFAs for networks with larger hidden size is a result of the transition function computation taking longer: this slows the BFS exploration and thus the extraction visits less states in the allotted time.

### 2.2. Balanced Parentheses

We trained a GRU and an LSTM network on the irregular language of balanced parentheses, and then attempted to extract automata from these networks. For both,  $L^*$  at first proposed a series of automata each representing the language of balanced parentheses to increasing nesting depth. Some of these are shown in Fig. 1. For the GRU network, after a certain point in the extraction, we even found a counterexample which showed the network had not generalized correctly to the language of balanced parentheses, and the next automaton returned resembled—but was not quite—an automaton for balanced parentheses nested to some depth.

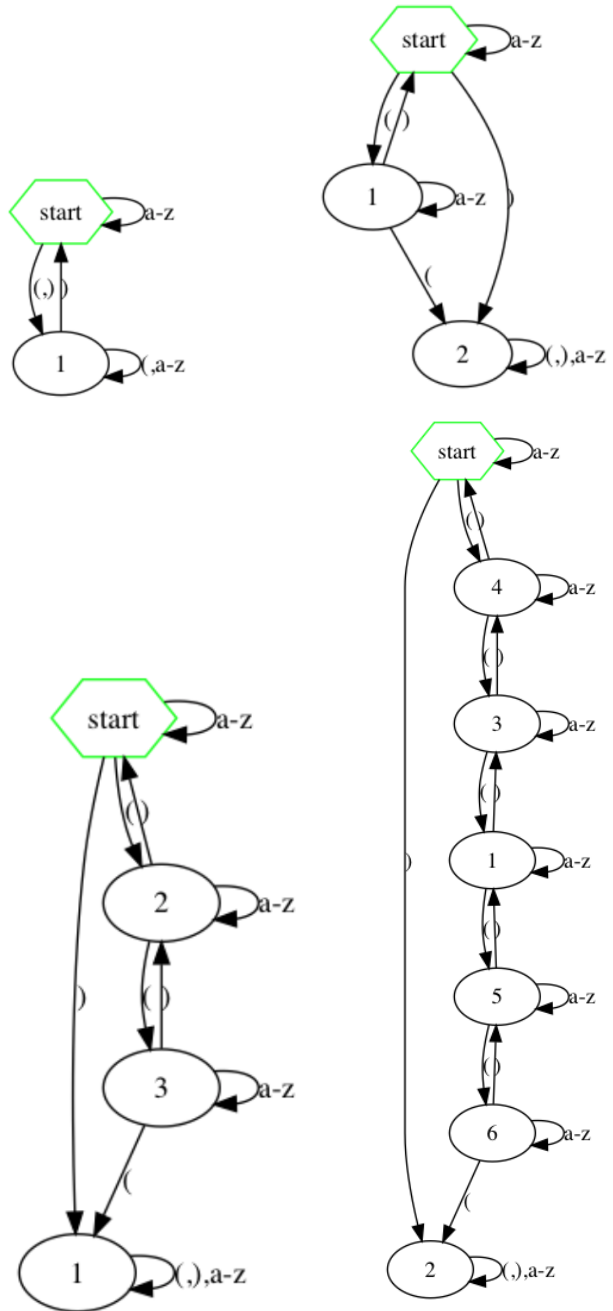

Figure 1. Select automata of increasing size for recognizing balanced parentheses over the 28 letter alphabet  $a-z, (, )$ , up to nesting depths 1 (flawed), 1 (correct), 2, and 5, respectively.

Table 1. Results for DFA extracted using our method from 2-layer GRU and LSTM networks with various state sizes, trained on random regular languages of varying sizes and alphabets. Each row in each table represents 3 experiments with the same parameters (network hidden-state size, alphabet size, and minimal target DFA size). Single values represent the average of the 3 experiments, multiple values list the result for each experiment. An extraction time of 30 seconds signals a timed out extraction (for which the last automaton proposed by L\* is taken as the extracted automaton).

| Hidden Size | Alphabet Size | Language / Target DFA Size | Extraction Time (s) | Extracted DFA Size | Average Extracted DFA Accuracy |       |       |        | Training |
|-------------|---------------|----------------------------|---------------------|--------------------|--------------------------------|-------|-------|--------|----------|
|             |               |                            |                     |                    | l=10                           | l=50  | l=100 | l=1000 |          |
| 50          | 3             | 5                          | 2.9                 | 5,5,6              | 100.0                          | 99.96 | 99.86 | 99.90  | 100.0    |
| 100         | 3             | 5                          | 2.9                 | 5,5,2              | 92.96                          | 92.96 | 93.73 | 93.46  | 91.06    |
| 500         | 3             | 5                          | 11.8                | 5,5,5              | 100.0                          | 100.0 | 100.0 | 99.96  | 100.0    |
| 50          | 5             | 5                          | 30, 30, 30          | 68, 59, 115        | 99.96                          | 99.93 | 99.76 | 99.93  | 99.99    |
| 100         | 5             | 5                          | 30, 7.7, 30         | 57, 5, 38          | 99.96                          | 99.96 | 99.96 | 99.90  | 100.0    |
| 500         | 5             | 5                          | 30, 20.7, 19.0      | 5, 5, 5            | 100.0                          | 100.0 | 99.93 | 99.90  | 100.0    |
| 50          | 3             | 10                         | 30, 30, 11.1        | 10, 10, 10         | 99.96                          | 99.96 | 99.90 | 99.90  | 100.0    |
| 100         | 3             | 10                         | 7.6, 30, 7.7        | 10, 10, 11         | 99.96                          | 99.93 | 99.96 | 99.96  | 100.0    |
| 500         | 3             | 10                         | 30, 30, 30          | 10, 9, 10          | 92.30                          | 92.80 | 93.70 | 93.43  | 92.30    |

| Hidden Size | Alphabet Size | Language / Target DFA Size | Extraction Time (s) | Extracted DFA Size | Average Extracted DFA Accuracy |       |       |        | Training |
|-------------|---------------|----------------------------|---------------------|--------------------|--------------------------------|-------|-------|--------|----------|
|             |               |                            |                     |                    | l=10                           | l=50  | l=100 | l=1000 |          |
| 50          | 3             | 5                          | 1.7                 | 5,5,6              | 100.0                          | 100.0 | 99.86 | 99.96  | 100.0    |
| 100         | 3             | 5                          | 4.1                 | 5,5,5              | 100.0                          | 100.0 | 100.0 | 99.96  | 100.0    |
| 500         | 3             | 5                          | 7.0                 | 5,5,5              | 100.0                          | 100.0 | 100.0 | 100.0  | 100.0    |
| 50          | 5             | 5                          | 30, 30, 8.2         | 150,93,5           | 100.0                          | 99.90 | 99.93 | 99.86  | 100.0    |
| 100         | 5             | 5                          | 9.0, 8.0, 30        | 5,5,16             | 100.0                          | 100.0 | 99.96 | 99.96  | 99.99    |
| 500         | 5             | 5                          | 15.5, 30, 25.6      | 5,5,5              | 100.0                          | 100.0 | 99.96 | 100.0  | 100.0    |
| 50          | 3             | 10                         | 30, 30, 30          | 11,11,155          | 99.96                          | 99.83 | 99.93 | 99.93  | 99.99    |
| 100         | 3             | 10                         | 11.0                | 11,10,11           | 100.0                          | 99.93 | 99.96 | 99.93  | 100.0    |
| 500         | 3             | 10                         | 30, 30, 30          | 10,10,10           | 100.0                          | 99.93 | 100.0 | 99.90  | 100.0    |

Table 2. Results for automata extracted using Omlin & Giles’ a-priori quantization as described in their 1996 paper, with quantization level 2, from the same networks used in Table 1 (3 networks for each set of parameters and network type).

| Hidden Size | Alphabet Size | Language/ Target DFA Size | Extracted DFA Sizes |      |      | Coverage / Accuracy (%) |      |       |       |       |       |       |        | Training |       |       |       |
|-------------|---------------|---------------------------|---------------------|------|------|-------------------------|------|-------|-------|-------|-------|-------|--------|----------|-------|-------|-------|
|             |               |                           | l=1                 | l=5  | l=10 | l=10                    | l=50 | l=100 | l=150 | l=200 | l=300 | l=500 | l=1000 | l=50     | l=100 |       |       |
| 50          | 3             | 5                         | 3109                | 3107 | 3107 | 100                     | 100  | 100   | 100   | 30.66 | 83.65 | 3.87  | 81.53  | 0.0      | NA    | 27.44 | 88.0  |
| 100         | 3             | 5                         | 2225                | 2252 | 2275 | 100                     | 100  | 100   | 100   | 7.57  | 80.50 | 0.07  | 50.0   | 0.0      | NA    | 19.31 | 84.57 |
| 500         | 3             | 5                         | 585                 | 601  | 584  | 100                     | 100  | 100   | 100   | 0.0   | NA    | 0.0   | NA     | 0.0      | NA    | 8.80  | 71.71 |
| 50          | 5             | 5                         | 1956                | 1973 | 1962 | 100                     | 100  | 100   | 73.93 | 0.03  | 100   | 0.0   | NA     | 0.0      | NA    | 12.39 | 78.34 |
| 100         | 5             | 5                         | 1392                | 1400 | 1400 | 100                     | 100  | 100   | 64.3  | 0.0   | NA    | 0.0   | NA     | 0.0      | NA    | 11.19 | 74.80 |
| 500         | 5             | 5                         | 359                 | 366  | 366  | 100                     | 100  | 33.43 | 70.60 | 0.0   | NA    | 0.0   | NA     | 0.0      | NA    | 6.24  | 73.92 |
| 50          | 3             | 10                        | 3135                | 3238 | 3228 | 100                     | 100  | 100   | 100   | 29.43 | 83.72 | 4.57  | 94.19  | 0.0      | NA    | 27.70 | 88.80 |
| 100         | 3             | 10                        | 2294                | 2282 | 2272 | 100                     | 100  | 100   | 100   | 0.90  | 91.30 | 0.0   | NA     | 0.0      | NA    | 16.83 | 81.07 |
| 500         | 3             | 10                        | 586                 | 589  | 589  | 100                     | 100  | 100   | 100   | 0.0   | NA    | 0.0   | NA     | 0.0      | NA    | 8.48  | 74.77 |

| Hidden Size | Alphabet Size | Language/ Target DFA Size | Extracted DFA Sizes |      |      | Coverage / Accuracy (%) |      |       |       |       |       |       |        | Training |       |       |       |
|-------------|---------------|---------------------------|---------------------|------|------|-------------------------|------|-------|-------|-------|-------|-------|--------|----------|-------|-------|-------|
|             |               |                           | l=1                 | l=5  | l=10 | l=10                    | l=50 | l=100 | l=150 | l=200 | l=300 | l=500 | l=1000 | l=50     | l=100 |       |       |
| 50          | 3             | 5                         | 4497                | 4558 | 4485 | 100                     | 100  | 100   | 100   | 50.73 | 90.52 | 25.26 | 91.95  | 2.66     | 96.25 | 42.28 | 91.08 |
| 100         | 3             | 5                         | 3188                | 3184 | 3197 | 100                     | 100  | 100   | 100   | 3.50  | 66.66 | 0.07  | 50.0   | 0.0      | NA    | 19.14 | 83.63 |
| 500         | 3             | 5                         | 1200                | 1221 | 1225 | 100                     | 100  | 100   | 100   | 0.0   | NA    | 0.0   | NA     | 0.0      | NA    | 8.98  | 74.45 |
| 50          | 5             | 5                         | 2810                | 2796 | 2802 | 100                     | 100  | 100   | 87.97 | 0.10  | 100   | 0.0   | NA     | 0.0      | NA    | 14.56 | 80.61 |
| 100         | 5             | 5                         | 1935                | 1941 | 1936 | 100                     | 100  | 100   | 73.17 | 0.0   | NA    | 0.0   | NA     | 0.0      | NA    | 12.05 | 76.39 |
| 500         | 5             | 5                         | 721                 | 706  | 749  | 100                     | 100  | 91.03 | 55.94 | 0.0   | NA    | 0.0   | NA     | 0.0      | NA    | 9.52  | 71.53 |
| 50          | 3             | 10                        | 4598                | 4582 | 4586 | 100                     | 100  | 100   | 100   | 15.73 | 79.76 | 1.23  | 70.71  | 0.0      | NA    | 24.32 | 86.93 |
| 100         | 3             | 10                        | 3203                | 3192 | 3194 | 100                     | 100  | 100   | 100   | 0.3   | 81.25 | 0.0   | NA     | 0.0      | NA    | 19.18 | 83.84 |
| 500         | 3             | 10                        | 1226                | 1209 | 1209 | 100                     | 100  | 100   | 100   | 0.0   | NA    | 0.0   | NA     | 0.0      | NA    | 13.39 | 76.64 |

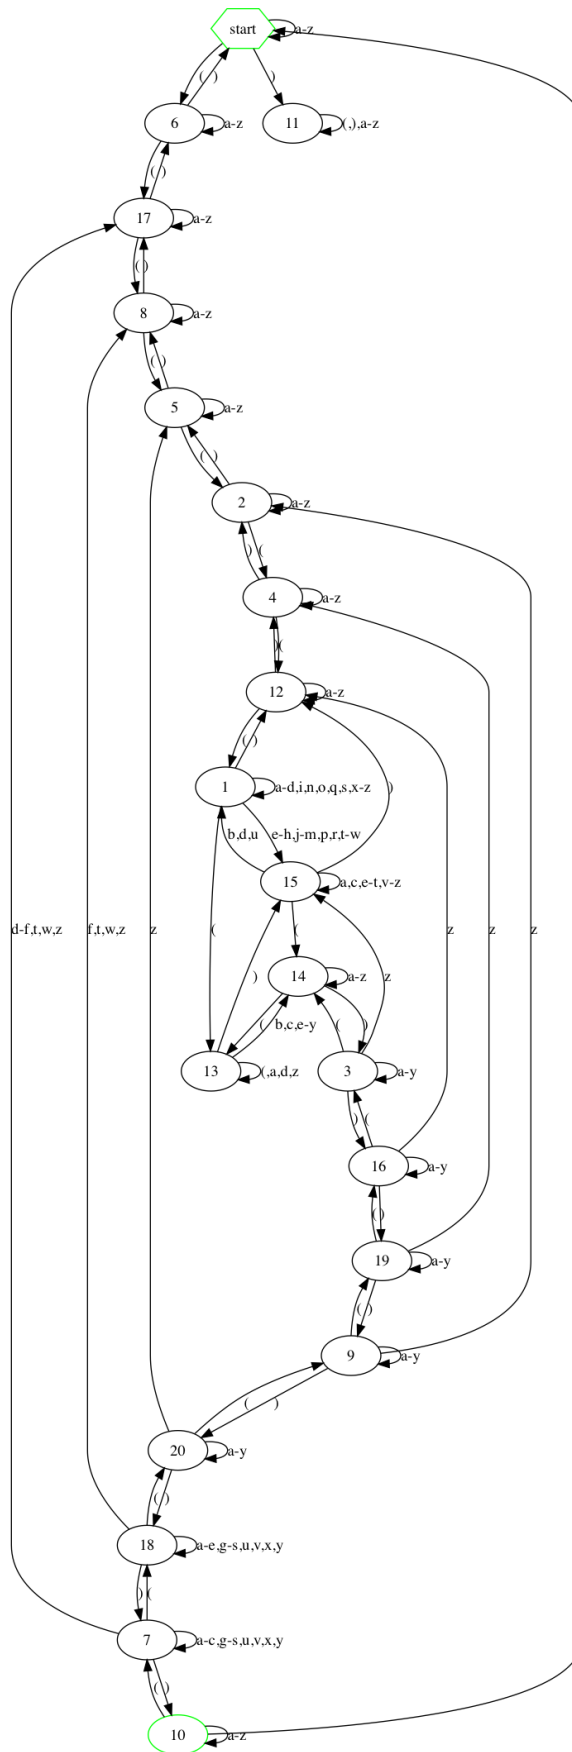

Figure 2. Automaton no longer representing a language of balanced parentheses up to a certain depth. (Showing how a trained network may be overfitted past a certain sample complexity.)



Table 4. Counterexamples returned to the equivalence queries made by L\* during extraction of a DFA from a network trained to 100% accuracy on both train and test sets on the regular language  $[a-z]^*1[a-z]^*2[a-z]^*3[a-z]^*4[a-z]^*5[a-z]^*$  over the 31-letter alphabet  $\{a,b, \dots, d, 1, 2, \dots, 5\}$ . Counterexamples highlighting the discrepancies between the network behavior and the target behavior are shown in bold.

**Counterexample Generation for the Counting Language**

| Counterexample | Generation Time (seconds) | Network Classification | Target Classification |
|----------------|---------------------------|------------------------|-----------------------|
| 12345          | provided                  | True                   | True                  |
| 512345         | 8.18                      | False                  | False                 |
| <b>aca11</b>   | 85.41                     | True                   | False                 |
| <b>blw11</b>   | 0.50                      | True                   | False                 |
| dnm11          | 0.96                      | False                  | False                 |
| bzm11          | 0.90                      | False                  | False                 |
| <b>drxr11</b>  | 0.911                     | True                   | False                 |
| brdb11         | 0.90                      | False                  | False                 |
| <b>elrs11</b>  | 1.16                      | True                   | False                 |
| hu11           | 1.93                      | False                  | False                 |
| ku11           | 2.59                      | False                  | False                 |
| ebj11          | 2.77                      | False                  | False                 |
| <b>pgl11</b>   | 3.77                      | True                   | False                 |
| reeg11         | 4.16                      | False                  | False                 |
| eipn11         | 5.66                      | False                  | False                 |

Table 5. Counterexamples returned to the equivalence queries made by L\* during extraction of a DFA from a network trained to 100% accuracy on both train and test sets on the regular language  $(\setminus[\setminus])\setminus([\setminus\text{SONTF}]([\setminus\text{SONTF}])^*\setminus])$  over the 8-letter alphabet  $\{[, ], S, 0, N, T, F, , \}$ . Counterexamples highlighting the discrepancies between the network behaviour and the target behaviour are shown in bold.

**Counterexample Generation for the Non-Nested Tokenized JSON-lists Language**

| Counterexample | Generation Time (seconds) | Network Classification | Target Classification |
|----------------|---------------------------|------------------------|-----------------------|
| []             | provided                  | True                   | True                  |
| [SS]           | 3.49                      | False                  | False                 |
| [[,]           | 7.12                      | True                   | False                 |
| [S,,           | 8.61                      | True                   | False                 |
| [0,F           | 8.38                      | True                   | False                 |
| [N,0,          | 8.07                      | False                  | False                 |
| [S,N,0,        | 9.43                      | True                   | False                 |
| [T,S,          | 9.56                      | False                  | False                 |
| [S,S,T,[]      | 15.15                     | False                  | False                 |
| [F,T,[         | 3.23                      | False                  | False                 |
| [N,F,S,0       | 10.04                     | True                   | False                 |
| [S,N,[,,,      | 27.79                     | True                   | False                 |
| [T,0,T,        | 28.06                     | True                   | False                 |
| [S,T,0,]       | 26.63                     | True                   | False                 |

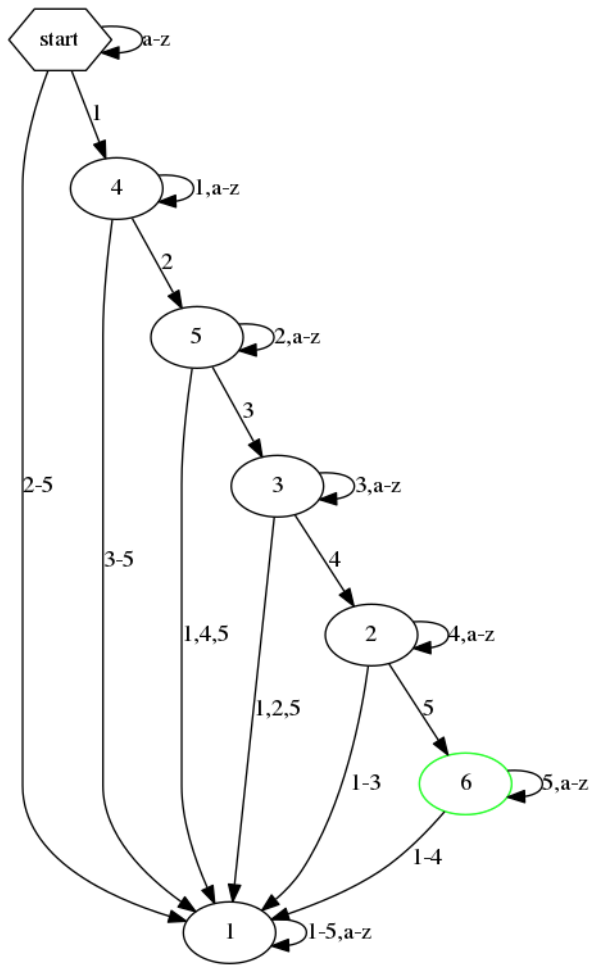

Figure 3. DFA representing the regular language  $[a-z]^*1[a-z1]^*2[a-z2]^*3[a-z3]^*4[a-z4]^*5[a-z5]^*\$$  over the alphabet  $\{a,b, \dots, z, 1, 2, \dots, 5\}$

state split by the method is justified by concrete inputs to the network, and so the extraction of a large DFA is a sign of the inherent complexity of the learned network behavior.

### 2.4. Train Set Details

The sizes, sample lengths, and positive to negative ratios of the samples in the train sets are listed here (Table 6) for each of the networks used in our main experiments, as well as for the JSON and Counting languages. Note that for some languages (such as the first Tomita grammar, 1\*), there are very few positive/negative samples. For these languages, the test sets are less balanced between positive and negative samples.

We reiterate that all networks used in this work were trained to 100% train set accuracy and reached at least 99.9% on a set of 1000 samples from each of the lengths 4, 7, 10, ..., 28.

An explicit description of the Tomita grammars can be found in (Tomita, 1982).

### References

Alur, R., Černý, P., Madhusudan, P., and Nam, W. Synthesis of interface specifications for java classes. In *Proceedings of the 32nd ACM SIGPLAN-SIGACT Symposium on Principles of Programming Languages*, POPL '05, pp. 98–109, New York, NY, USA, 2005. ACM. ISBN 1-58113-830-X. doi: 10.1145/1040305.1040314. URL <http://doi.acm.org/10.1145/1040305.1040314>.

Angluin, D. Learning regular sets from queries and counterexamples. *Inf. Comput.*, 75(2):87–106, 1987. doi: 10.1016/0890-5401(87)90052-6. URL [https://doi.org/10.1016/0890-5401\(87\)90052-6](https://doi.org/10.1016/0890-5401(87)90052-6).

Berg, T., Jonsson, B., Leucker, M., and Saksena, M. Insights to angluin’s learning. *Electr. Notes Theor. Comput. Sci.*, 118:3–18, 2005. doi: 10.1016/j.entcs.2004.12.015. URL <https://doi.org/10.1016/j.entcs.2004.12.015>.

Omlin, C. W. and Giles, C. L. Extraction of rules from discrete-time recurrent neural networks. *Neural Networks*, 9(1):41–52, 1996. doi: 10.1016/0893-6080(95)00086-0. URL [https://doi.org/10.1016/0893-6080\(95\)00086-0](https://doi.org/10.1016/0893-6080(95)00086-0).

Tomita, M. Dynamic construction of finite automata from examples using hill-climbing. In *Proceedings of the Fourth Annual Conference of the Cognitive Science Society*, pp. 105–108, Ann Arbor, Michigan, 1982.

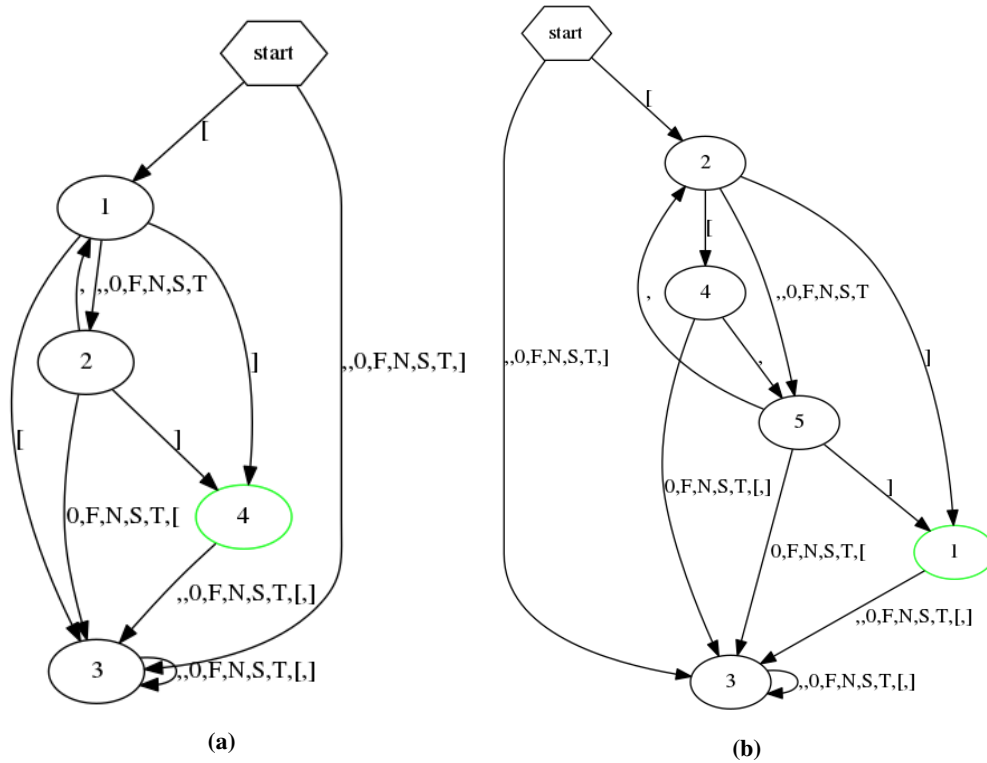

Figure 4. Two DFAs resembling, but not perfectly, the correct DFA for the regular language of tokenized JSON lists,  $(\backslash[\ ])(\backslash([S0NTF](,[S0NTF])^*\backslash))\$$ . DFA 4a is almost correct, but accepts also list-like sequences in which the last item is missing, i.e., there is a comma followed by a closing bracket. DFA 4b is returned by  $L^*$  after the teacher (network) rejects 4a, but is also not a correct representation of the target language — treating the sequence  $[ ,$  as a legitimate list item equivalent to the characters  $S,0,N,T,F$

Table 6. Train set statistics for networks used in this work. The random regular language networks used in the main work were based on minimal DFAs of size 10 over alphabets of size 3, with 3 languages per hidden state size. We list statistics for their train sets in grouped by the hidden size. The train set sizes and lengths were the same for each of these random languages, but the number of positive/negative samples found each time varied slightly.

Train Set Stats

| Language             | Architecture | Hidden Size | Train Set Size | Of Which Positive Samples | Lengths in Train Set |
|----------------------|--------------|-------------|----------------|---------------------------|----------------------|
| Tomita 1             | GRU          | 100         | 613            | 14                        | 0-13,16,19,22        |
| Tomita 2             | GRU          | 100         | 613            | 8                         | 0-13,16,19,22        |
| Tomita 3             | GRU          | 100         | 2911           | 1418                      | 0-13,16,19,22        |
| Tomita 4             | GRU          | 100         | 2911           | 1525                      | 0-13,16,19,22        |
| Tomita 5             | GRU          | 100         | 1833           | 771                       | 0-13,16,19,22        |
| Tomita 6             | GRU          | 100         | 3511           | 1671                      | 0-13,15-20           |
| Tomita 7             | GRU          | 100         | 2583           | 1176                      | 0-13,16,19,22        |
| Random 1-3           | GRU          | 50          | 16092          | 8038, 7768, 8050          | 1-15,16,18,...,26    |
| Random 4-6           | GRU          | 100         | 16092          | 7783, 7842, 8167          | 1-15,16,18,...,26    |
| Random 7-9           | GRU          | 500         | 16092          | 8080, 8143, 7943          | 1-15,16,18,...,26    |
| Balanced Parentheses | GRU          | 50          | 44697          | 25243                     | 0-73                 |
| Balanced Parentheses | LSTM         | 50          | 44816          | 28781                     | 0-81                 |
| emails               | LSTM         | 100         | 40000          | 20000                     | 0-34                 |
| JSON Lists           | GRU          | 100         | 20000          | 10000                     | 0-74                 |
| Counting             | LSTM         | 100         | 20000          | 10000                     | 0-43                 |
